# Supplementary material
Source: PubMed Central journal article supplement (PMC5812947)
Supplement: AEM.02526-17_zam005188349s1.pdf [file AEM.02526-17_zam005188349s1.pdf]

**Supplementary Table 1. Standard Corn-Soybean Starter Diet**

| <b>Ingredient</b>                     | <b>Percent in final feed</b> |
|---------------------------------------|------------------------------|
| Corn                                  | 62.80                        |
| Soybean Meal                          | 28.40                        |
| Poultry Fat                           | 5.00                         |
| Di-Calcium phosphate (18.5% P)        | 1.45                         |
| Limestone                             | 1.20                         |
| Salt                                  | 0.40                         |
| L-Lysine 78%                          | 0.24                         |
| DL-Methionine                         | 0.20                         |
| Choline Chloride 60%                  | 0.05                         |
| Poultry TM (TM-90)                    | 0.20                         |
| Poultry Breeder Vitamin Mix (NCSU-90) | 0.10                         |
